1 **The dilution effect limits plasmid horizontal transmission in multispecies bacterial communities**

2 Anastasia Kottara<sup>1</sup>, Laura Carrilero<sup>2</sup>, Ellie Harrison<sup>2</sup>, James P.J. Hall<sup>3</sup>, Michael A. Brockhurst<sup>1</sup>

3

4 <sup>1</sup>Faculty of Biology, Medicine and Health, University of Manchester, Manchester, M13 9PT, UK

5 <sup>2</sup>Department of Animal and Plant Sciences, University of Sheffield, Sheffield, S10 2TN, UK

6 <sup>3</sup>Department of Evolution, Ecology and Behaviour, Institute of Infection, Veterinary and Ecological

7 Sciences, University of Liverpool, Liverpool, L69 7ZB, UK

8

9 \*Corresponding author: Michael Brockhurst, Division of Evolution and Genomic Sciences, Faculty of

10 Biology, Medicine and Health, University of Manchester, Manchester, M13 9PT, UK. Email-

11 [michael.brockhurst@manchester.ac.uk](mailto:michael.brockhurst@manchester.ac.uk)

12

13 Keywords: horizontal gene transfer, mobile genetic elements, conjugative plasmids, bacterial

14 communities, plasmid transfer, experimental evolution

15

16

17

18

19

20

21

22

23

24

25

26

27 **Abstract**

28 By transferring ecologically important traits between species, plasmids drive genomic divergence and  
29 evolutionary innovation in their bacterial hosts. Bacterial communities are often diverse and contain  
30 multiple coexisting plasmids, but the dynamics of plasmids in multispecies communities are poorly  
31 understood. Here, we show, using experimental multispecies communities containing two plasmids,  
32 that bacterial diversity limits the horizontal transmission of plasmids due to ‘the dilution effect’; an  
33 epidemiological phenomenon whereby living alongside less proficient host species reduces the  
34 expected infection risk for a focal host species. In addition, plasmid horizontal transmission was also  
35 affected by plasmid diversity, such that the rate of plasmid conjugation was reduced from coinfecting  
36 host cells carrying both plasmids. In diverse microbial communities, plasmid spread may be limited by  
37 the dilution effect and plasmid-plasmid interactions reducing the rate of horizontal transmission.

38

39 **Introduction**

40 Mobile genetic elements (MGE) are an important source of potentially beneficial accessory traits for  
41 host bacteria, equipping these bacterial cells with new ready-to-use functions and thereby allowing them  
42 to expand their ecological niche [1-3]. Plasmids are common in bacterial communities, infecting diverse  
43 bacterial taxa [4], and often multiple plasmids co-exist in natural microbial communities [5-6]. The  
44 long-term persistence of plasmids in bacterial communities will depend both on the proficiency of host  
45 species to stably maintain plasmids in their populations by vertical transmission [7], and the rate of  
46 horizontal transmission of plasmids within and between species by conjugation [8].

47 Previous studies have shown that plasmids are not equally maintained across different host  
48 species [9-10], while plasmid transmission dynamics are affected by bacterial community structure [8].  
49 Thus, in communities where plasmids rely on horizontal transmission for their maintenance [8,11],  
50 plasmid dynamics could be affected by the diversity of the community, especially if the different host  
51 species differ in their proficiency and transmission rates. Studies focused on parasite transmission in  
52 host communities have shown that the transmission of multi-host parasites can be limited by species  
53 richness, which is termed the ‘dilution effect’ [12-13]: A focal host species has a reduced risk of parasite

54 infection when in a diverse community than would be expected from its intraspecific transmission rate,  
55 if transmission from other species in the community is less efficient [14]. We hypothesise that the  
56 dilution effect may also apply to plasmids in communities where hosts differ in their ability to maintain  
57 and transmit plasmids.

58 To gain a better understanding of plasmid dynamics in complex multi-plasmid / multi-host  
59 communities we constructed simple bacterial communities in effectively sterile potting soil (soil  
60 microcosms) under controlled laboratory conditions and tracked plasmid dynamics over-time.  
61 Specifically, communities contained two distinct conjugative plasmids, pQBR57 and pQBR103, that  
62 are known to vary in their rate of conjugation within populations of the focal species, *P. fluorescens*  
63 SBW25 [15]. *P. fluorescens* SBW25 populations were embedded within a community of five  
64 *Pseudomonas* species, and these were compared to controls where *P. fluorescens* SBW25 was  
65 propagated in monoculture. We report that presence of the *Pseudomonas* community reduced the rate  
66 of plasmid co-infection in *P. fluorescens* SBW25 in line with there being a dilution effect limiting the  
67 rate of horizontal transmission in more diverse communities.

68

## 69 **Materials and methods**

### 70 **Bacterial strains and plasmids**

71 *P. fluorescens* SBW25 [16] was the plasmid-donor in this study, carrying either the plasmid pQBR57  
72 or pQBR103. *P. fluorescens* SBW25 was labelled by directed insertion of gentamicin resistance ( $Gm^R$ )  
73 as previously described [17]. The plasmids used in this study, pQBR103 and pQBR57 are large  
74 conjugative plasmids (425 kb and 307 kb respectively) that confer mercury resistance via a *mer* operon  
75 encoded on a Tn5042 transposon [5, 15, 18]. Both plasmids were independently conjugated into  
76 gentamicin resistant ( $Gm^R$ ) *P. fluorescens* SBW25 from streptomycin resistant ( $Sm^R$ ) plasmid-bearing  
77 *P. fluorescens* SBW25. pQBR57 was also conjugated from *P. fluorescens* SBW25  $Sm^R$  into *P.*  
78 *fluorescens* SBW25(pQBR103)  $Gm^R$  in order to obtain *P. fluorescens* SBW25 (pQBR103:pQBR57).  
79 Each plasmid-donor was mixed in 1:1 ratio with the plasmid-recipient strain, incubated for 48 h and  
80 spread on King's B (KB) agar plates containing  $10 \mu\text{g ml}^{-1}$  gentamicin and  $20 \mu\text{M}$  of mercury(II) chloride

81 to select for transconjugant colonies [19]. As previously described, the conjugation assays were  
82 conducted in 6 ml KB growth medium in 30 ml universal vials ('microcosms') at 28°C in shaking  
83 conditions (180 rpm). Background communities consisted of five different *Pseudomonas* species; *P.*  
84 *stutzeri* JM300 (DSM 10701) [20], *P. putida* KT2440 [21], *P. protegens* Pf-5 [22], *P. fluorescens* Pf0-  
85 1 [23], *P. aeruginosa* PAO1 [24].

86

### 87 **Selection experiment**

88 Twelve colonies of the plasmid-bearing *P. fluorescens* SBW25(pQBR103) and *P. fluorescens*  
89 SBW25(pQBR57) were grown overnight in KB microcosms at 28°C with shaking 180 rpm. Six  
90 colonies of each of the plasmid-free *Pseudomonas* species (*P. stutzeri* JM300 (DSM 10701), *P. putida*  
91 KT2440, *P. protegens* Pf-5, *P. fluorescens* Pf0-1, *P. aeruginosa* PAO1) were also grown overnight in  
92 KB microcosms using the same culture conditions. Six replicate populations containing equal  
93 proportions of *P. fluorescens* SBW25(pQBR103) and *P. fluorescens* SBW25(pQBR57) were  
94 propagated either with or without the background community of five *Pseudomonas* species. Populations  
95 were grown in potting soil microcosms supplemented with mercury (16 µg g<sup>-1</sup> Hg(II)). Each community  
96 had a starting ratio of 1:1 between *P. fluorescens* SBW25(pQBR103) and *P. fluorescens*  
97 SBW25(pQBR57) (~each 1x10<sup>6</sup> cfu g<sup>-1</sup>) such that the starting frequencies of pQBR103 and pQBR57  
98 were approximately 50%. The background community of *Pseudomonas* species contained each species  
99 in equal proportion (~each 4x10<sup>5</sup> cfu g<sup>-1</sup>). To prepare the soil inoculum, the mix of each community  
100 (final volume: 100 µl) was centrifuged for 1 min at 10,000 rpm and resuspended in 1 ml M9 salt solution  
101 [25]. Next, the soil microcosms (10 g twice-autoclaved John Innes No. 2 compost soil) were inoculated  
102 with 100 µl of the mix, briefly vortexed to disperse the inoculum in the soil, and incubated at 28°C at  
103 80% humidity [8]. Every 4 days, 10 ml of M9 buffer and 20 glass beads were added to each soil  
104 microcosm and mixed by vortexing for 1 min, and 100 µl of soil wash was transferred to a fresh soil  
105 microcosm as previously described by Hall *et al.* [8]. The communities were propagated for 6 transfers  
106 (24 days, estimated to be approx. 42 bacterial generations).

107           At each transfer, total population counts were estimated by plating onto non-selective KB agar  
108 plates. Bacterial counts for the plasmid-bearing *P. fluorescens* SBW25 strains were estimated by plating  
109 onto selective media: 10 µg ml<sup>-1</sup> gentamicin KB agar plates. Each of these plates were then replica  
110 plated onto mercury KB agar plates (100 µM mercury(II) chloride) in order to assess the frequency of  
111 mercury resistance within *P. fluorescens* SBW25 and at the whole-community level. Twenty-four  
112 colonies of *P. fluorescens* SBW25 were sampled every 2 transfers from the mercury containing plates  
113 and tested for the presence of the plasmids and mercury transposon by PCR screening. Twenty-four  
114 colonies of the total community were randomly sampled from the mercury containing plates at two  
115 time-points (transfers 4 and 6) and also tested for the presence of the plasmids and mercury transposon.  
116 The PCR screening was designed to use three set of primers that targeted the *mer* operon-Tn5042  
117 transposon [forward primer: 5'-TGCAAGACACCCCCTATTGGAC-3', reverse primer: 5'-  
118 TTCGGCGACCAGCTTGATGAAC-3'], the pQBR103-plasmid specific origin of replication *oriV*  
119 [forward primer: 5'-TGCCTAATCGTGTGTAATGTC-3', reverse primer: 5'-  
120 ACTCTGGCCTGCAAGTTTC-3'] and the pQBR57-plasmid specific *uvrD* gene [forward primer: 5'-  
121 CTTCGAAGCACACCTGATG-3', reverse primer: 5'-TGAAGGTATTGGCTGAAAGG-3'] [26].

122

### 123 **Competitive fitness assay**

124 Four individual colonies of the ancestral *P. fluorescens* SBW25(pQBR103:pQBR57) were competed  
125 against the plasmid-free *P. fluorescens* SBW25 with and without the five-species community. The  
126 fitness assay was performed with and without mercury in soil microcosms. Relative fitness was  
127 measured by mixing differentially the plasmid-bearer (Gm<sup>R</sup>) and plasmid-free (Sm<sup>R</sup>) in 1:1 ratio. The  
128 five-species community was added in the same ratio as at the beginning of the selection experiment.  
129 The inoculum was diluted 100-fold in M9 salts before being added into soil microcosms and incubated  
130 at 28°C and 80% humidity for 4 days. Samples were plated on KB agar plates supplemented with  
131 selective concentration of 10 µg ml<sup>-1</sup> gentamicin and 50 µg ml<sup>-1</sup> streptomycin at the beginning and end  
132 of the competition to estimate the density of plasmid-bearing and plasmid-free bacteria. The relative  
133 fitness was calculated as the selection rate (*r*) [27].

134

## 135 **Conjugation assay**

136 Four individual colonies of each ancestral *P. fluorescens* SBW25 (pQBR103:pQBR57), *P. fluorescens*  
137 SBW25 (pQBR103) and *P. fluorescens* SBW25 (pQBR57) were conjugated into the isogenic plasmid-  
138 free strain. Conjugation rate of the different plasmids was measure by mixing differentially the plasmid-  
139 bearer (Gm<sup>R</sup> or Sm<sup>R</sup>) and plasmid-free (Sm<sup>R</sup> or Gm<sup>R</sup> respectively) in 1:1 ratio. The mix was centrifuged  
140 for 1 min at 10,000 rpm to remove spent media, resuspended in M9 salt solution, diluted 100-fold in  
141 high (KB), medium (0.1x KB) and low (0.01x KB) resource media and incubated at 28°C for 48 h. KB  
142 agar plates were supplemented with 10 µg ml<sup>-1</sup> gentamicin or 50 µg ml<sup>-1</sup> streptomycin to estimate the  
143 density of plasmid-donor and plasmid-recipient bacteria at the beginning and end of the assay. KB agar  
144 plates were supplemented with 10 µg ml<sup>-1</sup> gentamicin and 20 µM mercury(II) chloride or 50 µg ml<sup>-1</sup>  
145 streptomycin and 20 µM mercury(II) chloride to estimate the density of the transconjugant bacteria at  
146 the end of the assay. The conjugation rate was calculated with the method firstly described by Simonsen  
147 *et al.* [19].

148

## 149 **Statistical analyses**

150 Statistical analyses were performed using RStudio version 3.2.3 [28]. The prevalence of each plasmid  
151 status (pQBR103 only, pQBR57 only, or both) in *P. fluorescens* SBW25 was estimated as the area  
152 under the curve using the function *auc* of the package ‘flux’ [29]. One-way ANOVA tests compared  
153 plasmid prevalence in *P. fluorescens* SBW25 with versus without the community. Kruskal-Wallis test  
154 was used to analyse the end-point frequency of each plasmid at a whole-community level since the data  
155 was not normally distributed. Welch’s t-test was used to analyse the effect of the background  
156 community on the relative fitness of *P. fluorescens* SBW25 carrying both plasmids. Kruskal-Wallis test  
157 was used to assess the differences between the conjugation rates of pQBR57 and pQBR57: pQBR103  
158 in the different resource media as the data were not normally distributed; the conjugation rate of  
159 pQBR103 plasmid was not in detectable range in medium and low resource media thus pQBR103 was  
160 not included in this statistical analysis. Welch’s t-test was used to compare the conjugation rate of

161 pQBR57 to pQBR57:pQBR103 and pQBR103 plasmid in high resource media where the conjugation  
162 rate of each plasmid was in detectable range.

163

## 164 **Results**

### 165 **Plasmid co-infection limited in community**

166 While mercury resistance remained at fixation in all replicates, we observed contrasting plasmid  
167 dynamics in the *P. fluorescens* SBW25 population with versus without the background *Pseudomonas*  
168 community. In the presence of the background community, in the majority of replicates the *P.*  
169 *fluorescens* SBW25 population was dominated by pQBR103, such that bacteria were typically either  
170 singly-infected by pQBR103 or co-infected with both pQBR103 and pQBR57. By contrast, in the  
171 absence of the background community we observed higher rates of co-infection with both pQBR103  
172 and pQBR57, or, in a single replicate, the fixation of pQBR57. Overall, we observed that the frequency  
173 of plasmid co-infection was higher in the absence of the background community (ANOVA  $F_{1,10}=5.569$ ,  
174  $p=0.039$ ; Figure 1). To test if this effect could be caused by higher fitness costs of plasmid co-infection  
175 in the presence versus absence of the community, perhaps due to more intense resource competition,  
176 we competed *P. fluorescens* SBW25(pQBR103:pQBR57) against plasmid-free *P. fluorescens* SBW25  
177 with or without the background community. We found, however, that the presence of the background  
178 community had no effect on the relative fitness of *P. fluorescens* SBW25(pQBR103:pQBR57) (Welch's  
179 t-test,  $t_{13.68}=0.698$ ,  $p=0.496$ ; Figure 2).

180 pQBR57 is known to have a far higher conjugation rate than pQBR103 in potting soil [15],  
181 therefore it is likely that co-infection would have often resulted from pQBR57 conjugating into cells  
182 that already carried pQBR103. This process of infectious transmission through the *P. fluorescens*  
183 SBW25 population could have been less efficient in the presence of the background community if,  
184 rather than conjugating into *P. fluorescens* SBW25(pQBR103), pQBR57 conjugated into the other  
185 *Pseudomonas* species. This is conceptually similar to the dilution effect in epidemiology whereby  
186 biodiversity reduces infection risk in a focal species [13]. Consistent with this idea, we observed high  
187 levels of mercury resistance in the total community, of which *P. fluorescens* SBW25 made up only

188 ~18% of the total mercury resistant fraction at the end of the experiment, confirming plasmid  
189 transmission of the *mer* operon into the other taxa (Figure 3). Within the mercury resistant fraction of  
190 the total community, we were able to detect the more highly conjugative plasmid pQBR57, but not  
191 pQBR103, at an appreciable frequency ( $X^2(2, N=18)=12.176$ ,  $p=0.002$ ; Figure 4). Together these  
192 suggest that, indeed, the transmission of pQBR57 into *P. fluorescens* SBW25(pQBR103) cells was  
193 impeded by dilution by the community leading to reduced co-infection of *P. fluorescens* SBW25.

194 Finally, we tested whether the rate of conjugation to plasmid-free recipient cells varied  
195 depending on whether the donor was singly-infected or co-infected, and whether conjugation rates were  
196 affected by resource level to mimic the effects of increased resource competition in more diverse  
197 communities. Conjugation rates from all backgrounds — *P. fluorescens* SBW25(pQBR103), *P.*  
198 *fluorescens* SBW25(pQBR57), and *P. fluorescens* SBW25 (pQBR103:pQBR57) — were reduced in  
199 diluted media (effect of resource media,  $X^2(2, N=22)=16.85$ ,  $p<0.001$ ; Figure 5; conjugation of  
200 pQBR103 was not detectable in medium and low resource media). Consistent with previous studies,  
201 conjugation rates from pQBR57-containing backgrounds were far higher than those from *P. fluorescens*  
202 SBW25(pQBR103) (Welch's t-test,  $t_{5.581} = -14.973$ ,  $p<0.001$ ), but co-infected donors had a reduced  
203 conjugation rate compared to *P. fluorescens* SBW25(pQBR57) donors (Welch's t-test,  $t_{5.773} = -5.751$ ,  
204  $p=0.001$ ; Figure 5). These results suggest that co-infection itself may have reduced the rate at which  
205 pQBR57 spread in the *P. fluorescens* SBW25 population, and that greater resource competition in the  
206 presence of the background community may have reduced the rate of infectious spread of both plasmids.

207

## 208 Discussion

209 Using simple soil bacterial communities, we show that plasmid co-infection in a focal host species was  
210 reduced in the presence of a community of other bacterial species. This was not caused by differential  
211 fitness effects of plasmid-carriage in monocultures versus communities, but rather appears to have been  
212 determined by the effect of bacterial species richness on the epidemiology of horizontal transmission  
213 of plasmids in the focal host population. Whereas, in monocultures, the highly conjugative plasmid  
214 pQBR57 spread into the *P. fluorescens* SBW25(pQBR103) sub-population, in communities this spread



215 was impeded. Detection of pQBR57 at appreciable frequencies in the total community suggests that  
216 this effect was due to a substantial fraction of conjugation events leading to the infection of non-SBW25  
217 cells by pQBR57. Because the conjugation rate of pQBR57 may also be lower from other *Pseudomonas*  
218 species (e.g., this is known to be the case for *P. putida* [8]), this interspecific conjugation is likely to  
219 have had the effect of reducing the overall conjugation rate to *P. fluorescens* SBW25(pQBR103) cells  
220 and thus lowering the probability of plasmid co-infection.

221         Similar to plasmids, the transmission of parasites has often been found to be lower in species-  
222 rich communities where a focal species is diluted in the diverse community and therefore has a reduced  
223 risk of infection [14, 30-32]. The dilution effect is supported by experimental studies and  
224 epidemiological models which suggest that introducing communities of alternative hosts could help to  
225 control the transmission of vector-borne diseases caused by parasites (zooprophylaxis) [33-36]. The  
226 identity of the introduced host species has important implications in preventing the parasites'  
227 transmission, as different host species are likely to vary in their susceptibility to hosting the parasite  
228 [37]. Highly susceptible host species could amplify the disease reservoir of a parasite instead of  
229 suppressing it, therefore in order to prevent the dissemination of a parasite, the enrichment of these host  
230 species should be restricted in the community [37]. Similar dynamics could apply to plasmids, where  
231 host species are known to vary widely in their proficiency to host and transmit plasmids [8].

232         Parasite epidemiological models also suggest that the species richness of the parasite  
233 community can affect the transmission of a focal parasite [38-39]. Both parasite diversity and co-  
234 infection have been found to reduce the transmission rate of parasites in a community [38]. Similarly,  
235 here we found that the conjugation rate from the donor *P. fluorescens* SBW25(pQBR103:pQBR57) was  
236 lower compared with the *P. fluorescens* SBW25(pQBR57) donor. This suggests that plasmid co-  
237 infection itself could limit the transmission rate of highly conjugative plasmids, like pQBR57. We  
238 speculate that plasmid co-infection affected the plasmid transmission as a result of plasmid-plasmid  
239 interactions in the host cell [40]. Co-existing plasmids could trigger a stronger cellular response in the  
240 host cell, while the increase in genetic sequence and encoded genes is likely to amplify the physiological  
241 and metabolic cost to the host cell, moreover co-infecting plasmids are likely to compete for limited  
242 cellular resources (i.e host's replication factors; [41]). Indeed, we predict that intracellular competition

243 is likely to be more intense between related plasmids, since these will have the greatest overlap in their  
244 resource requirements e.g. similar suites of tRNAs.

245 In nature, bacteria inhabit species-rich communities wherein they co-exist with multiple diverse  
246 plasmids [42-43]. The experiments reported here highlight that plasmid dynamics can be affected by  
247 both bacterial and plasmid diversity. Plasmids are currently of clinical concern as they often carry and  
248 disseminate antimicrobial resistance genes (ARGs) [44]. ARGs are found in bacterial communities  
249 colonizing diverse environments where microbial communities can act as resistance reservoirs [45-46].  
250 Expansion of the resistance reservoirs via HGT between bacterial communities is currently an  
251 increasing concern [47]. Understanding the transmission dynamics of ARG-encoding plasmids at the  
252 community-level is therefore imperative in order to constrain the emergence of resistance in natural  
253 microbial communities. This work suggests that plasmid dissemination along with the resistance genes  
254 they encode in a focal taxon (e.g. a pathogen) could be limited in more species-rich communities, where  
255 plasmid transmission is constrained by the dilution effect.

256

#### 257 **Funding information**

258 This work was supported by funding from the European Research Council under the European Union's  
259 Seventh Framework Programme awarded to MAB [grant number FP7/2007-2013/ERC grant StG-2012-  
260 311490-COEVOCON] and a Philip Leverhulme Prize from Leverhulme Trust awarded to MAB [grant  
261 number PLP-2014-242] and grants to MAB from the Natural Environment Research Council  
262 [NE/R008825/1] and Biotechnology and Biological Sciences Research Council [BB/R006253/1;  
263 BB/R018154/1].

264

#### 265 **Acknowledgements**

266 We would like to thank the late Prof. Stuart Levy for providing the strain *P. fluorescens* Pf0-1 and Dr.  
267 Christoph Keel for providing the strain *P. protegens* Pf-5.

268

#### 269 **Conflicts of interest**

270 None declared.

271

272 **References**

- 273 1. Frost LS, Leplae R, Summers AO, Toussaint A. Mobile genetic elements: the agents of open  
274 source evolution. *Nature Rev Microbiol* 2005;3:722-732. doi: 10.1038/nrmicro1235
- 275 2. Norman A, Hansen LH, Sørensen SJ. Conjugative plasmids: vessels of the communal gene  
276 pool. *Phil Trans R Soc B* 2009;364:2275-2289. doi: 10.1098/rstb.2009.0037
- 277 3. Brockhurst MA, Harrison E, Hall JP, Richards T, McNally A *et al.* The ecology and evolution  
278 of pangenomes. *Curr Biol* 2019;29:R1094-R1103. doi: 10.1016/j.cub.2019.08.012
- 279 4. Smalla K, Sobecky PA. The prevalence and diversity of mobile genetic elements in bacterial  
280 communities of different environmental habitats: insights gained from different methodological  
281 approaches. *FEMS Microbiol Ecol* 2002;42(2):165-175. doi: 10.1111/j.1574-  
282 6941.2002.tb01006.x
- 283 5. Lilley AK, Bailey MJ, Day MJ, Fry JC. Diversity of mercury resistance plasmids obtained by  
284 exogenous isolation from the bacteria of sugar beet in three successive years. *FEMS Microbiol*  
285 *Ecol* 1996;20:211-227. doi: 10.1111/j.1574-6941.1996.tb00320.x
- 286 6. Heuer H, Smalla K. Plasmids foster diversification and adaptation of bacterial populations in  
287 soil. *FEMS Microbiol Rev* 2012;36(6):1083-1104. doi: 10.1111/j.1574-6976.2012.00337.x
- 288 7. Kottara A, Hall JP, Brockhurst MA. The proficiency of the original host species determines  
289 community-level plasmid dynamics. *FEMS Microbiol Ecol* 2021;97(4):fiab026. doi:  
290 10.1093/femsec/fiab026
- 291 8. Hall JP, Wood AJ, Harrison E, Brockhurst MA. Source–sink plasmid transfer dynamics  
292 maintain gene mobility in soil bacterial communities. *P Natl Acad Sci USA* 2016;113(29):8260-  
293 8265. doi: 10.1073/pnas.1600974113
- 294 9. De Gelder L, Ponciano JM, Joyce P, Top EM. Stability of a promiscuous plasmid in different  
295 hosts: no guarantee for a long-term relationship. *Microbiology* 2007;153:452-463. doi:  
296 10.1099/mic.0.2006/001784-0

- 297 10. Kottara A, Hall JP, Harrison E, Brockhurst MA. Variable plasmid fitness effects and mobile  
298 genetic element dynamics across *Pseudomonas* species. *FEMS Microbiol Ecol*  
299 2018;94(1):fix172. doi: 10.1093/femsec/fix172
- 300 11. Dionisio F, Matic I, Radman M, Rodrigues OR, Taddei F. Plasmids spread very fast in  
301 heterogeneous bacterial communities. *Genetics* 2002;162(4):1525-1532. doi:  
302 10.1093/genetics/162.4.1525
- 303 12. Civitello DJ, Cohen J, Fatima H, Halstead NT, Liriano J *et al.* Biodiversity inhibits parasites:  
304 broad evidence for the dilution effect. *P Natl Acad Sci USA* 2015;112(28):8667-8671. doi:  
305 10.1073/pnas.1506279112
- 306 13. Levi T, Keesing F, Holt RD, Barfield M, Ostfeld RS. Quantifying dilution and amplification in  
307 a community of hosts for tick-borne pathogens. *Ecol Appl* 2016;26(2):484-498. doi:  
308 10.1890/15-0122
- 309 14. LoGiudice K, Ostfeld RS, Schmidt KA, Keesing F. The ecology of infectious disease: effects  
310 of host diversity and community composition on Lyme disease risk. *P Natl Acad Sci USA*  
311 2003;100(2):567-571. doi: 10.1073/pnas.0233733100
- 312 15. Hall JP, Harrison E, Lilley AK, Paterson S, Spiers AJ *et al.* Environmentally co-occurring  
313 mercury resistance plasmids are genetically and phenotypically diverse and confer variable  
314 context-dependent fitness effects. *Environ Microbiol* 2015;17:5008-22. doi: 10.1111/1462-  
315 2920.12901
- 316 16. Rainey PB, Bailey MJ, Thompson IP. Phenotypic and genotypic diversity of fluorescent  
317 pseudomonads isolated from field-grown sugar beet. *Microbiology* 1994;140:2315-2331. doi:  
318 10.1099/13500872-140-9-2315
- 319 17. Lambertsen L, Sternberg C, Molin S. Mini-Tn7 transposons for site-specific tagging of bacteria  
320 with fluorescent proteins. *Environ Microbiol* 2004;6:726-732. doi: 10.1111/j.1462-  
321 2920.2004.00605.x

- 322 18. Tett A, Spiers AJ, Crossman LC, Ager D, Ciric L *et al.* Sequence-based analysis of pQBR103;  
323 a representative of a unique, transfer-proficient mega plasmid resident in the microbial  
324 community of sugar beet. *ISME J* 2007;1:331-340. doi: 10.1038/ismej.2007.47
- 325 19. Simonsen L, Gordon DM, Stewart FM, Levin BR. Estimating the rate of plasmid transfer: an  
326 end-point method. *Microbiology* 1990;136:2319-2325. doi: 10.1099/00221287-136-11-2319
- 327 20. Carlson CA, Pierson LS, Rosen JJ, Ingraham JL. *Pseudomonas stutzeri* and related species  
328 undergo natural transformation. *J Bacteriol* 1983;153(1):93-99. doi: 10.1128/JB.153.1.93-  
329 99.1983
- 330 21. Bagdasarian M, Lurz R, Rückert B, Franklin FC, Bagdasarian MM *et al.* Specific-purpose  
331 plasmid cloning vectors II. Broad host range, high copy number, RSF 1010-derived vectors,  
332 and a host-vector system for gene cloning in *Pseudomonas*. *Gene* 1981;16(1-3):237-247. doi:  
333 10.1016/0378-1119(81)90080-9
- 334 22. Howell CR, Stipanovic RD. Control of *Rhizoctonia solani* on cotton seedlings with  
335 *Pseudomonas fluorescens* and with an antibiotic produced by the bacterium. *Phytopathology*  
336 1979;69(5):480-482. doi: 10.1094/Phyto-69-480
- 337 23. Compeau G, Al-Achi BJ, Platsouka E, Levy SB. Survival of rifampin-resistant mutants of  
338 *Pseudomonas fluorescens* and *Pseudomonas putida* in soil systems. *Appl Environ Microbiol*  
339 1988;54(10):2432-2438.
- 340 24. Holloway BW. Genetic recombination in *Pseudomonas aeruginosa*. *Microbiology*  
341 1955;13:572-581. doi: 10.1099/00221287-13-3-572
- 342 25. Sambrook J, Fritsch EF, Maniatis T. Molecular cloning: a laboratory manual. *Cold Spring*  
343 *Harbor Laboratory Press* 1989; (No. Ed. 2).
- 344 26. Carrilero L, Kottara A, Guymer D, Harrison E, Hall JP, Brockhurst MA. Positive selection  
345 inhibits plasmid coexistence in bacterial genomes. *mBio* 2021; 12(3). doi:  
346 10.1128/mBio.00558-21
- 347 27. Lenski RE, Rose MR, Simpson SC, Tadler SC. Long-term experimental evolution in  
348 *Escherichia coli*. I. Adaptation and divergence during 2,000 generations. *Am Nat*  
349 1991;138:1315-1341. doi: 10.1086/285289

- 350 28. R Core Team. R: A language and environment for statistical computing. R Foundation for  
351 Statistical Computing, Vienna, Austria 2013;Online: <http://www.R-project.org>.
- 352 29. Jurasinski G, Koebsch F, Hagemann U. Flux rate calculation from dynamic closed chamber  
353 measurements. *R package* 2012;version 0.2-1.
- 354 30. Ostfeld RS, Keesing F. Biodiversity and disease risk: the case of Lyme disease. *Conserv Biol*  
355 2000;14(3):722-728. doi: 10.1046/j.1523-1739.2000.99014.x
- 356 31. Keesing F, Holt RD, Ostfeld RS. Effects of species diversity on disease risk. *Ecol*  
357 *Lett* 2006;9(4):485-498. doi: 10.1111/j.1461-0248.2006.00885.x
- 358 32. Johnson PT, Hartson RB, Larson DJ, Sutherland DR. Diversity and disease: community  
359 structure drives parasite transmission and host fitness. *Ecol Lett* 2008;11(10):1017-1026. doi:  
360 10.1111/j.1461-0248.2008.01212.x
- 361 33. Burdon JJ, Chilvers GA. Host density as a factor in plant disease ecology. *Annu Rev*  
362 *Phytopathol* 1982;20(1):143-166. doi: 10.1146/annurev.py.20.090182.001043
- 363 34. Dobson A, Cattadori I, Holt RD, Ostfeld RS, Keesing F *et al*. Sacred cows and sympathetic  
364 squirrels: the importance of biological diversity to human health. *PLoS Med* 2006;3(6):e231.  
365 doi: 10.1371/journal.pmed.0030231
- 366 35. Lane RS, Mun J, Eisen L, Eisen RJ. Refractoriness of the western fence lizard (*Sceloporus*  
367 *occidentalis*) to the Lyme disease group spirochete *Borrelia bissettii*. *J*  
368 *Parasitol* 2006;92(4):691-696. doi: 10.1645/GE-738R1.1
- 369 36. Elton CS. The ecology of invasions by animals and plants. *Springer Nature* 2020.
- 370 37. Keesing F, Brunner J, Duerr S, Killilea M, LoGiudice K *et al*. Hosts as ecological traps for the  
371 vector of Lyme disease. *Proc R Soc B* 2009;276(1675):3911-3919. doi:  
372 10.1098/rspb.2009.1159
- 373 38. Johnson PT, Hoverman JT. Parasite diversity and coinfection determine pathogen infection  
374 success and host fitness. *P Natl Acad Sci USA* 2012;109(23):9006-9011. doi:  
375 10.1073/pnas.1201790109

- 376 39. Johnson PT, Preston DL, Hoverman JT, LaFonte BE. Host and parasite diversity jointly control  
377 disease risk in complex communities. *P Natl Acad Sci USA* 2013;110(42):16916-16921. doi:  
378 10.1073/pnas.1310557110
- 379 40. Gama JA, Zilhão R, Dionisio F. Conjugation efficiency depends on intra and intercellular  
380 interactions between distinct plasmids: plasmids promote the immigration of other plasmids  
381 but repress co-colonizing plasmids. *Plasmid* 2017;93:6-16. doi:  
382 10.1016/j.plasmid.2017.08.003
- 383 41. Del Solar G, Giraldo R, Ruiz-Echevarría MJ, Espinosa M, Díaz-Orejas R. Replication and  
384 control of circular bacterial plasmids. *Microbiol Mol Biol Rev* 1998;62(2):434-464. doi:  
385 10.1128/MMBR.62.2.434-464.1998
- 386 42. Smillie C, Garcillán-Barcia MP, Francia MV, Rocha EP, de la Cruz F. Mobility of plasmids.  
387 *Microbiol Mol Biol Rev* 2010;74(3):434-452. doi: 10.1128/MMBR.00020-10
- 388 43. Klümper U, Riber L, Dechesne A, Sannazzarro A, Hansen LH *et al.* Broad host range plasmids  
389 can invade an unexpectedly diverse fraction of a soil bacterial community. *ISME*  
390 *J* 2015;9(4):934-945. doi: 10.1038/ismej.2014.191
- 391 44. Carattoli A. Plasmids and the spread of resistance. *Int J Med Microbiol* 2013;303(6-7):298-  
392 304. doi: 10.1016/j.ijmm.2013.02.001
- 393 45. Allen HK, Donato J, Wang HH, Cloud-Hansen KA, Davies J *et al.* Call of the wild: antibiotic  
394 resistance genes in natural environments. *Nat Rev Microbiol* 2010;8(4):251-259. doi:  
395 10.1038/nrmicro2312
- 396 46. Wright GD. Antibiotic resistance in the environment: a link to the clinic?. *Curr Opin Microbiol*  
397 2010;13(5):589-594. doi: 10.1016/j.mib.2010.08.005
- 398 47. Von Wintersdorff CJ, Penders J, Van Niekerk JM, Mills ND, Majumder S *et al.* Dissemination  
399 of antimicrobial resistance in microbial ecosystems through horizontal gene transfer. *Front*  
400 *Microbiol* 2016;7:173. doi: 10.3389/fmicb.2016.00173

401

402

403 **Figure legends**

404 **Figure 1.** Plasmid ratio and plasmid profile in *P. fluorescens* SBW25. *P. fluorescens* + community  
405 panels show the plasmid prevalence in *P. fluorescens* when plasmid-bearing *P. fluorescens* species were  
406 co-cultured with the five-species community; *P. fluorescens* panels show the plasmid prevalence in *P.*  
407 *fluorescens* when *P. fluorescens* was cultured as single-species. Co-existence of both, pQBR57 and  
408 pQBR103 plasmids (yellow); pQBR103 plasmid (green); pQBR57 plasmid (red).

409

410 **Figure 2.** Relative fitness of *P. fluorescens* (pQBR103:pQBR57) in absence and presence of the five-  
411 species community. 0  $\mu\text{g g}^{-1}$  Hg(II) (pink), 16  $\mu\text{g g}^{-1}$  Hg(II) (blue). Circles represent the individual data  
412 points of four clonal replicates. Error bars represent the SEM of four clonal replicates.

413

414 **Figure 3.** Densities of the total community and of the *P. fluorescens* SBW25 population over time.  
415 Solid lines show mean density of the total community (blue) and of the *P. fluorescens* SBW25  
416 population (pink). Dotted lines show mean density of mercury resistant cells in the total community  
417 (blue) and the *P. fluorescens* SBW25 population (pink). Grey shaded areas show standard errors (n =  
418 6).

419

420 **Figure 4.** a. Plasmid genotype frequencies in the total community at the end of the experiment. Each  
421 box shows the upper and lower quartile, the interquartile range (IDR, length of box) and the median  
422 (solid line across the box) of each plasmid genotype frequency in the replicate populations (A-F, n=6).  
423 Circles show the outliers of the data. b. Counts of plasmid genotypes in each replicate population (A-  
424 F) from twenty-four colonies sampled from the mercury resistant fraction of the total community at the  
425 end of the experiment. Co-existence of both, pQBR57 and pQBR103 plasmids (yellow); pQBR103  
426 plasmid (green); pQBR57 plasmid (red).

427



428 **Figure 5.** Conjugation rate of *P. fluorescens* (pQBR103:pQBR57), *P. fluorescens* (pQBR103) and *P.*  
429 *fluorescens* (pQBR57) in high, medium and low resource media. Error bars represent the SEM of four  
430 clonal replicates.

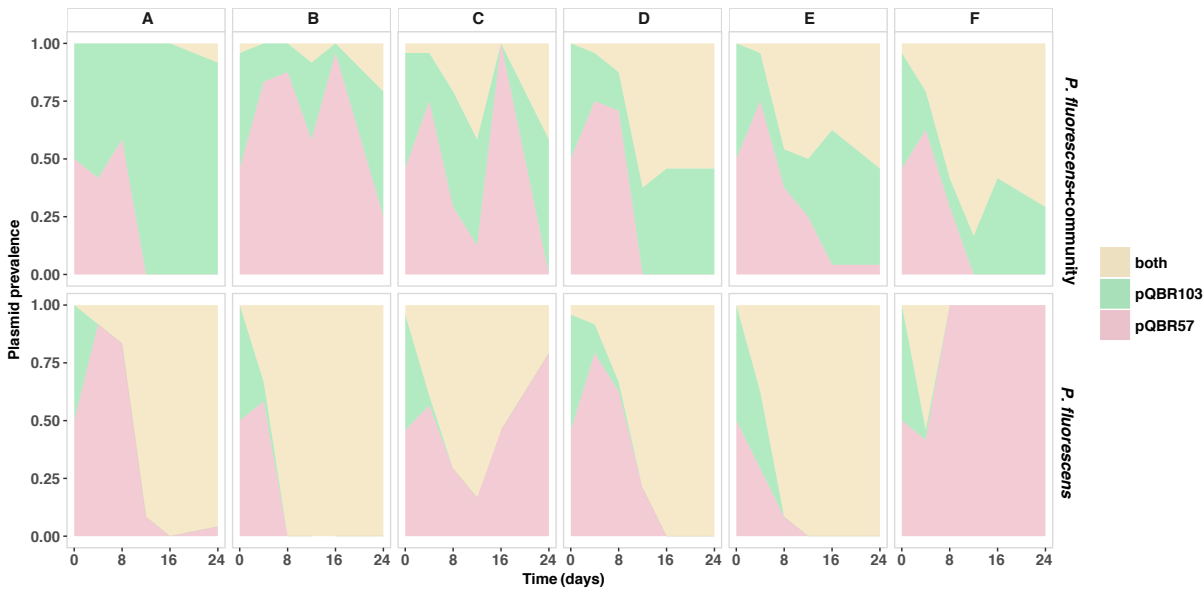

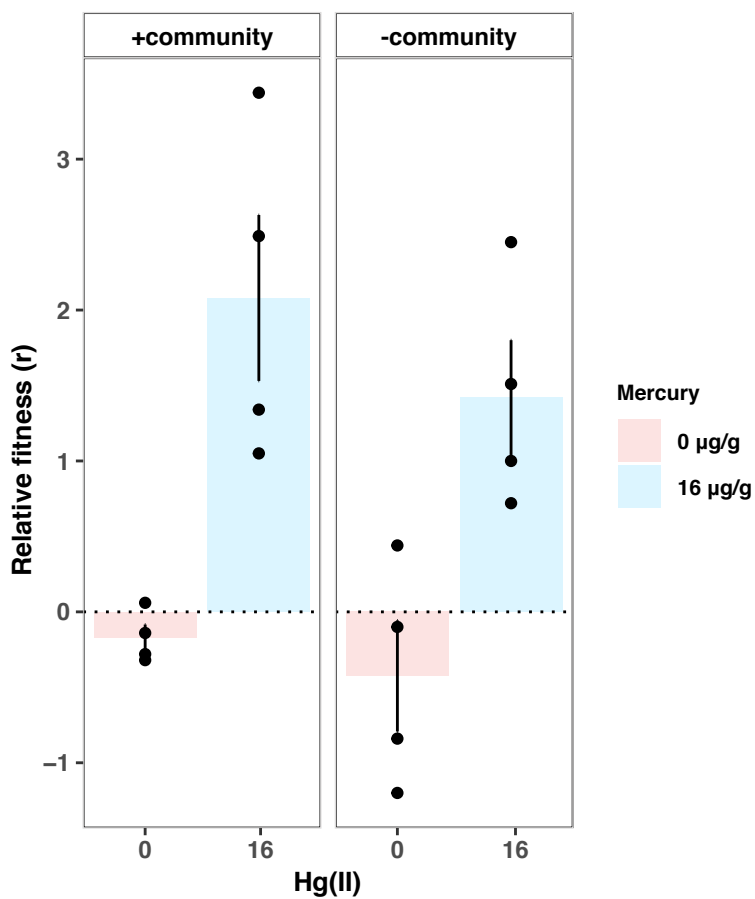

Density (CFU/g soil,  $\times 10^8$ )

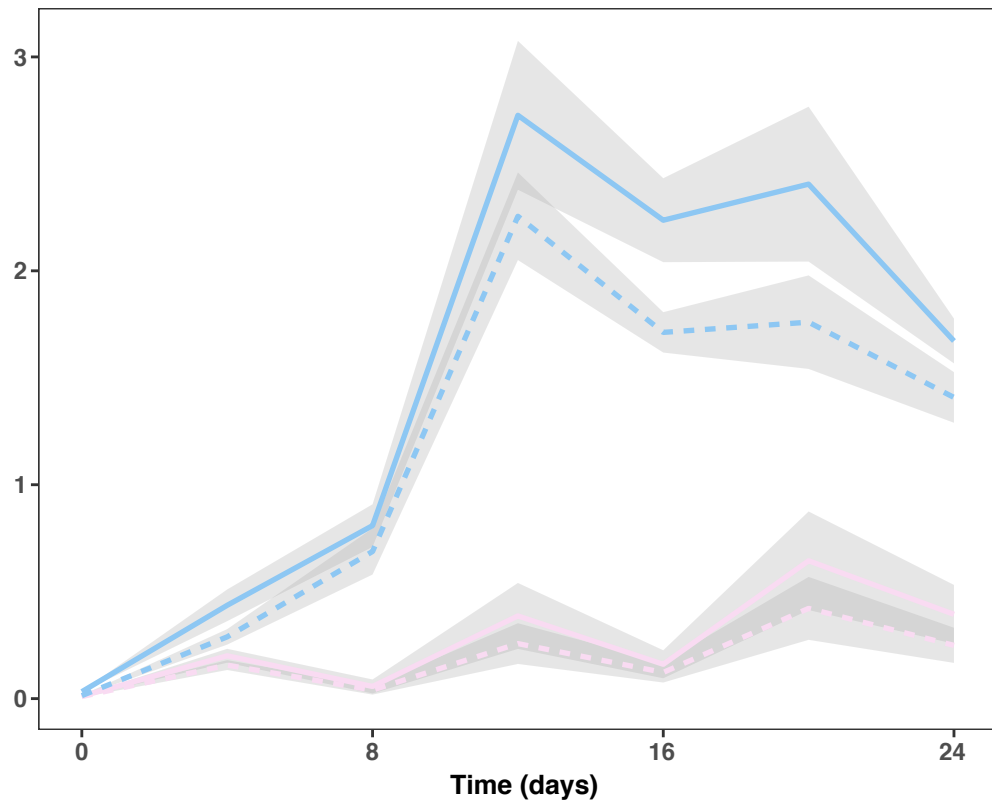

*P. fluorescens* population

*P. fluorescens* population MerA+

Total population

Total population MerA+

**a**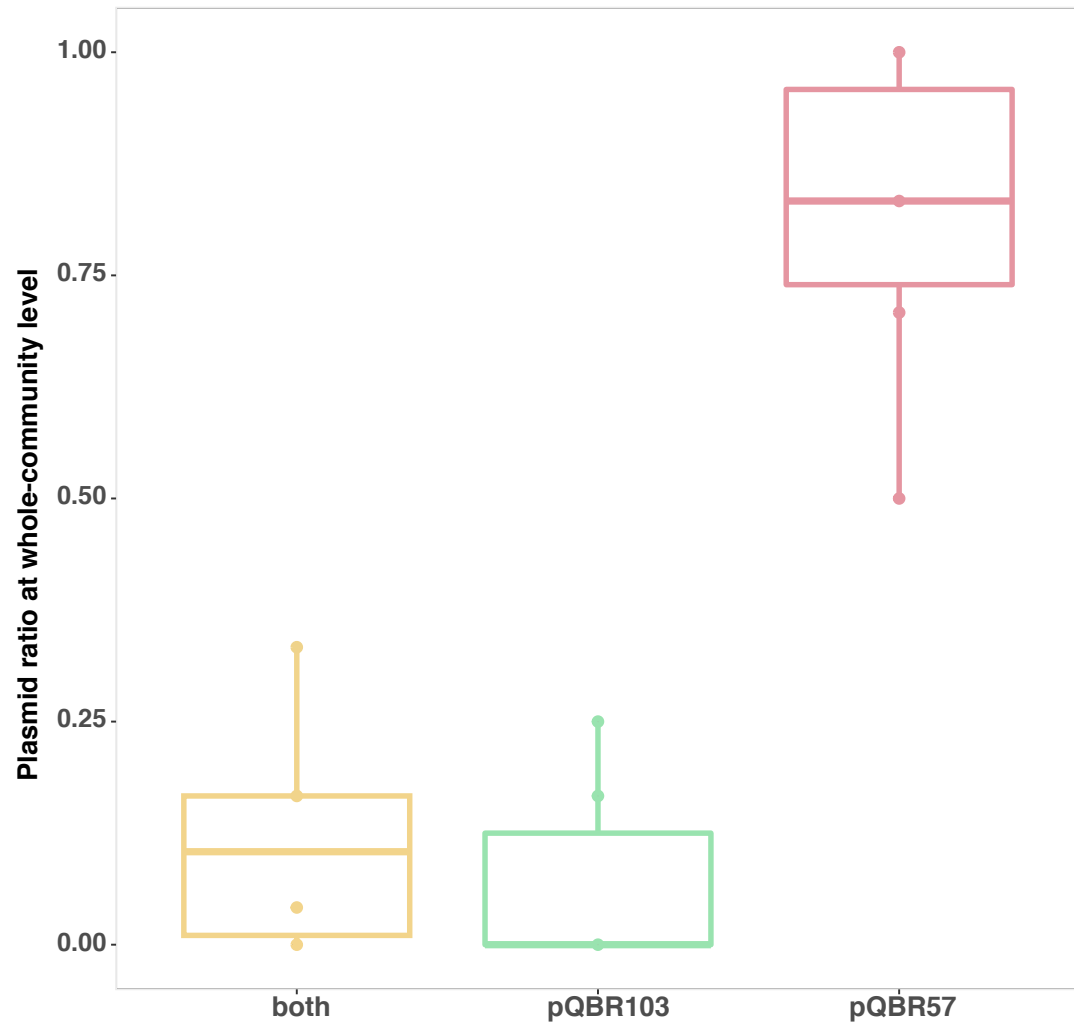**b**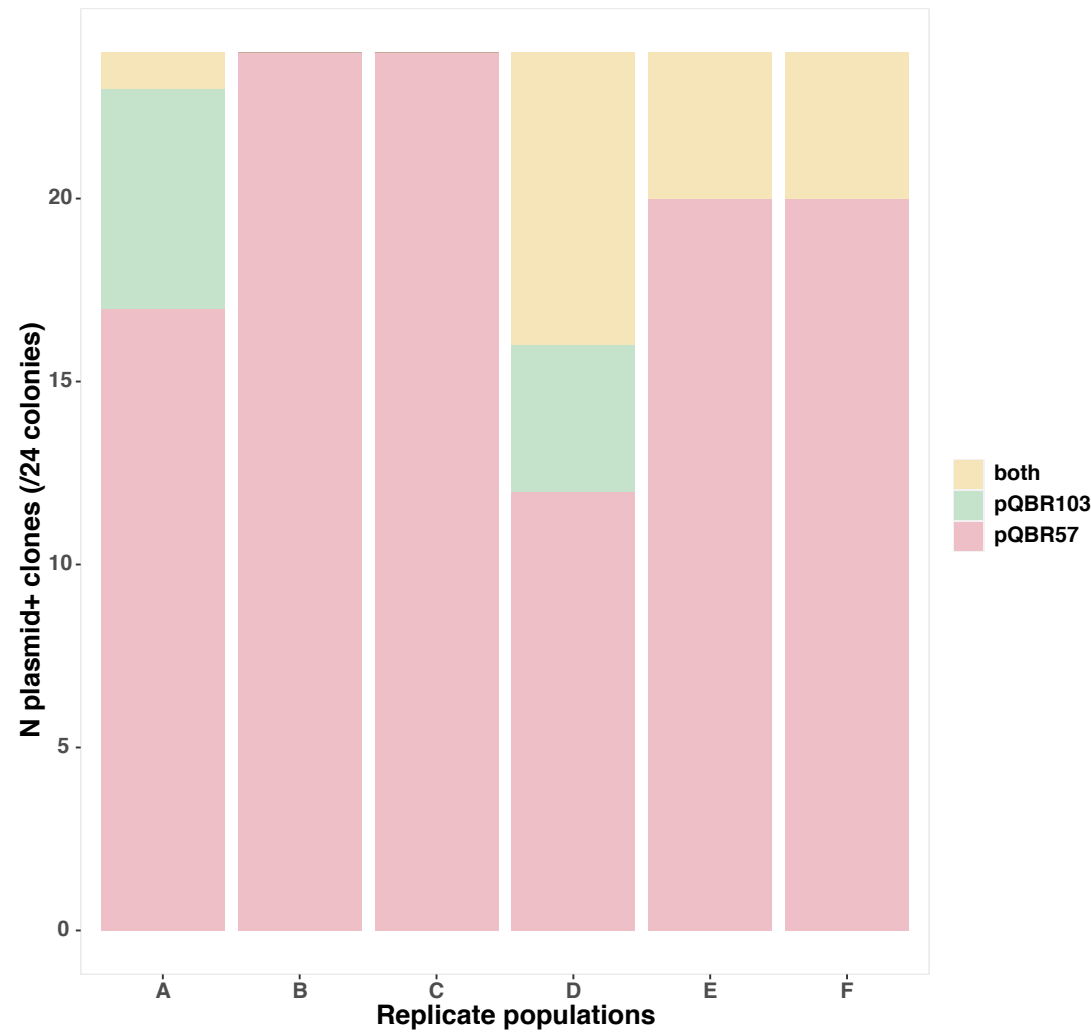

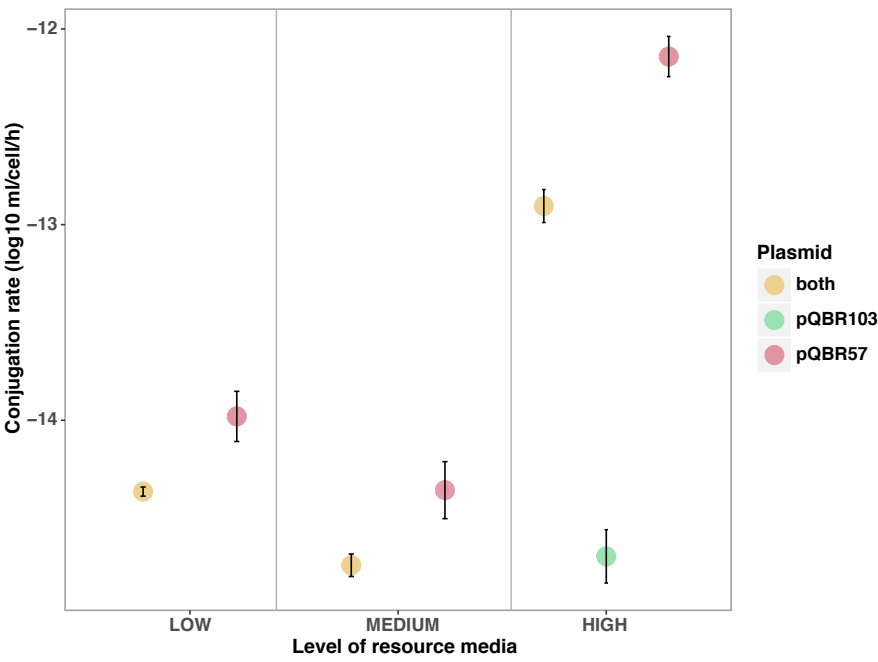

Source: https://biorxiv.org/content/10.1101/2021.05.18.444624v1.full.pdf
